# Supplementary material for: Beneficial Effects of the mTOR Inhibitor Everolimus in Patients with Advanced Medullary Thyroid Carcinoma: Subgroup Results of a Phase II Trial
Source: PubMed Central journal article supplement (PMC4532868; doi:10.1155/2015/348124), 2015-07-29
Supplement: 348124.f1.pdf [file 348124.f1.pdf]

**Supplementary Table 1 Somatic mutations**

| <b>Sample ID</b> | <b>Gene</b> | <b>Chromosome</b> | <b>Chromosome position</b> | <b>Exon</b> | <b>Coverage</b> | <b>Mutation Frequency (%)</b> | <b>AA change</b> | <b>Co</b>   |    |
|------------------|-------------|-------------------|----------------------------|-------------|-----------------|-------------------------------|------------------|-------------|----|
| <b>MTC29</b>     | RET         | 10                | 43617416                   | 16          | 85              | 21,18                         | c.2753T>C        | p.Met918Thr | CC |
| <b>MTC31</b>     | RET         | 10                | 43617416                   | 16          | 1751            | 64,13                         | c.2753T>C        | p.Met918Thr | CC |
| <b>MTC33</b>     | RET         | 10                | 43617416                   | 16          | 606             | 64,13                         | c.2753T>C        | p.Met918Thr | CC |
| <b>MTC34</b>     | EGFR        | 7                 |                            | 21          | 2093            | 51,84                         | c.2543C>T        | p.Pro848Leu | CC |
| <b>MTC34</b>     | RET         | 10                | 43617416                   | 16          | 647             | 50,85                         | c.2753T>C        | p.Met918Thr | CC |
| <b>MTC34</b>     | RET         | 10                | 43609101                   | 10          |                 |                               | c.1858T>C        | p.Cys620Arg | CC |

The reference sequences used were NM\_020975.4 for RET and NM\_005228 for EGFR
